# Supplementary material
Source: MDPI journal article supplement (https://www.mdpi.com/2077-0472/13/6/1111)
Supplement: s1 [file s1]

**Table S1.** Phenotypic and physiological-biochemical features of isolated *Pseudomonas* spp.

| Property                      | Strains                                                       |                                                          |                                                                               |                                                         |                                                                    |                                                                                                                           |                                                                                         |
|-------------------------------|---------------------------------------------------------------|----------------------------------------------------------|-------------------------------------------------------------------------------|---------------------------------------------------------|--------------------------------------------------------------------|---------------------------------------------------------------------------------------------------------------------------|-----------------------------------------------------------------------------------------|
|                               | UOM 9                                                         | UOM 10                                                   | UOM 11                                                                        | UOM 13                                                  | UOM 14                                                             | UOM 15                                                                                                                    | UOM 16                                                                                  |
| Gram nature / Form            | - / rod-shaped                                                | - / rod                                                  | - / rod                                                                       | - / rod                                                 | - / rod-shaped                                                     | - / rod-shaped                                                                                                            | - / rod                                                                                 |
| Colony morphology on MPA      | creamy, round, shiny, smooth, slimy, white spot in the center | yellow-orange, round, shiny, smooth, with a dense center | cream with a pink tint, round, shiny, smooth, slimy, white spot in the center | white-yellow, round, shiny, smooth, cream-colored edges | white, round shiny, smooth, with a dense center, transparent edges | yellow (as they age – orange), round shiny, smooth, with a dense center, convex, blurry edges, uneven, transparent, rough | yellow-orange, round, shiny, smooth, with a dense center, a light shade along the edges |
| Temperature                   | 4–37°C, optimum 20–28°C                                       | 8–41°C, optimum 26–28°C                                  | 4–30°C, optimum 22–26°C                                                       | 4–37°C, optimum 28–30°C                                 | 4–35°C, optimum 26–30°C                                            | 20–40°C, optimum 26–28°C                                                                                                  | 18–30°C, optimum 23–25°C                                                                |
| Maximum NaCl, %               | 3                                                             | 3                                                        | 3                                                                             | 3                                                       | 7                                                                  | 7                                                                                                                         | 3                                                                                       |
| Flagellum                     | single polar                                                  | single polar                                             | single polar                                                                  | two polar                                               | single polar                                                       | single polar                                                                                                              | two polar                                                                               |
| Fluorescence on King B medium | -                                                             | +                                                        | -                                                                             | -                                                       | +                                                                  | -                                                                                                                         | +                                                                                       |
| Katalase / Oxidase            | + / +                                                         | + / +                                                    | + / +                                                                         | + / +                                                   | + / +                                                              | + / +                                                                                                                     | + / -                                                                                   |
| Agrinine dihydrolase          | -                                                             | +                                                        | -                                                                             | +                                                       | +                                                                  | -                                                                                                                         | -                                                                                       |
| Production of:                |                                                               |                                                          |                                                                               |                                                         |                                                                    |                                                                                                                           |                                                                                         |
| H <sub>2</sub> S              | -                                                             | -                                                        | -                                                                             | -                                                       | +                                                                  | -                                                                                                                         | +                                                                                       |
| Indole                        | -                                                             | -                                                        | -                                                                             | -                                                       | -                                                                  | -                                                                                                                         | -                                                                                       |
| Nitrates reduction            | +                                                             | +                                                        | +                                                                             | -                                                       | -                                                                  | +                                                                                                                         | -                                                                                       |
| Oxidation of:                 |                                                               |                                                          |                                                                               |                                                         |                                                                    |                                                                                                                           |                                                                                         |
| D-sorbitol                    | +                                                             | -                                                        | -                                                                             | +                                                       | +                                                                  | +                                                                                                                         | -                                                                                       |
| myo-inositol                  | -                                                             | -                                                        | +                                                                             | -                                                       | +                                                                  | -                                                                                                                         | +                                                                                       |
| Sucrose                       | +                                                             | -                                                        | +                                                                             | -                                                       | -                                                                  | -                                                                                                                         | +                                                                                       |
| L-alanine                     | +                                                             | -                                                        | +                                                                             | -                                                       | +                                                                  | +                                                                                                                         | -                                                                                       |
| L-serine                      | +                                                             | +                                                        | +                                                                             | -                                                       | +                                                                  | -                                                                                                                         | +                                                                                       |
| L-histidine                   | +                                                             | -                                                        | +                                                                             | +                                                       | +                                                                  | -                                                                                                                         | -                                                                                       |
| Assimilation of:              |                                                               |                                                          |                                                                               |                                                         |                                                                    |                                                                                                                           |                                                                                         |
| D-Maltose                     | +                                                             | -                                                        | -                                                                             | +                                                       | +                                                                  | +                                                                                                                         | -                                                                                       |
| Citrate                       | -                                                             | +                                                        | +                                                                             | +                                                       | -                                                                  | -                                                                                                                         | +                                                                                       |
| D-glucose                     | +                                                             | -                                                        | +                                                                             | -                                                       | +                                                                  | +                                                                                                                         | +                                                                                       |
